# Supplementary material for: Characteristics and Prediction of RNA Editing Sites in Transcripts of the Moss Takakia lepidozioides Chloroplast
Source: PubMed Central journal article supplement — DNA Res. 2008 Jul 23;15(5):309–21. doi: 10.1093/dnares/dsn016 (PMC2575889; doi:10.1093/dnares/dsn016), 2008-07-23
Supplement: dsn016_1.pdf [file dsn016_1.pdf]

Supplementary Table S1. Primers used for chloroplast DNA, and cDNA amplification and sequencing

## For amplification of chloroplast DNA

| DNA fragment             | Name | Sequence (5'→ 3')          | Ref.       |
|--------------------------|------|----------------------------|------------|
| Fragment 1<br>(702 bp)   | 1-1  | CTGAGAAGAACCCATAGAGAAAA    | This study |
|                          | 1-2  | TATTATTTCTTTTACTACTTCTTTTG | This study |
| Fragment 2<br>(1223 bp)  | 2-1  | CCTCCAAACGAATACGATACTG     | AF231894   |
|                          | 2-2  | GGTCAAAAAGGTTATTATTTCGTTAG | AY312947   |
| Fragment 3<br>(743 bp)   | 3-1  | TGTGTCAATGAAAAGAGATAGAAAC  | This study |
|                          | 3-2  | AACGATATTACAACCTTTTCTCTC   | This study |
| Fragment 4<br>(2136 bp)  | 4-1  | TATGCCACGACTGTACCGCC       | AY312947   |
|                          | 4-2  | GAACCTATGGGAGATGCTTGG      | AB086179   |
| Fragment 5<br>(3834 bp)  | 5-1  | CAATTCATTAATACTCATAGCCC    | This study |
|                          | 5-2  | AAAAATTGCATGTTGGGTTCTCG    | AB086179   |
| Fragment 6<br>(1566 bp)  | 6-1  | AGGGCTATACGGATTTGAACC      | AB086179   |
|                          | 6-2  | TAGTCCCGTAGAAACAATTAAGG    | AY688826   |
| Fragment 7<br>(1563 bp)  | 7-1  | GAGCCATTACACGAAGATTAG      | This study |
|                          | 7-2  | GACTTTTCTCGGTACAATCAG      | This study |
| Fragment 8<br>(1588 bp)  | 8-1  | ATACGAGCCCCTGGTGGTTC       | AY688826   |
|                          | 8-2  | CTCCAGCAACAGACTCTATG       | AY312936   |
| Fragment 9<br>(844 bp)   | 9-1  | TTAATTGAGTTGTAGGGAGGG      | This study |
|                          | 9-2  | ACCTCCTGTCGAATAGTCAATGCG   | AY312936   |
| Fragment 10<br>(753 bp)  | 10-1 | TGAAGACACGATGAAAAGGGCG     | AY312936   |
|                          | 10-2 | TTTCTTCTTATTCACCTCTATC     | This study |
| Fragment 11<br>(2037 bp) | 11-1 | TTGCTCGTAAGGTAATGAAGT      | AY312936   |
|                          | 11-2 | AAGAATGGAAGGTAAGTAAGAGG    | AB086179   |
| Fragment 12<br>(1775 bp) | 12-1 | ACAGCCTCTTACTTACCTTCC      | This study |
|                          | 12-2 | ATCCAAGCTAGTTTTTTTATTCATC  | AP005672   |
| Fragment 13<br>(1686 bp) | 13-1 | TAGTAGAATTTCCAAACGATATAG   | This study |
|                          | 13-2 | GATTACCTATTTTTTCTTTCATTTT  | AB086179   |
| Fragment 14<br>(1138 bp) | 14-1 | GGAATTATAAGCCGGGGTAGC      | This study |
|                          | 14-2 | CAGCAACCATCAATAAGAGAGGAA   | This study |
| Fragment 15<br>(1477 bp) | 15-1 | GATGCAGAAATAGTACCTCAAG     | AB086179   |
|                          | 15-2 | TGAAAAGGGAGTAAGATAAATGG    | This study |
| Fragment 16<br>(847 bp)  | 16-1 | TAAAITGTACGTGTATAGTTCCCTTC | This study |
|                          | 16-2 | TTATGTCCTCCCTCGCCTCTAC     | This study |
| Fragment 17<br>(2337 bp) | 17-1 | GGAACCTCTGTCCGGCTCTC       | This study |
|                          | 17-2 | TACTATTCCAGACAGCAAAGC      | AB086179   |
| Fragment 18<br>(2943 bp) | 18-1 | AATCTAGGTAATTTGCTTTACGAGGG | This study |
|                          | 18-2 | GACTAGAGTTAAACGTGGGTATG    | AP005672   |
| Fragment 19<br>(2192 bp) | 19-1 | ATTTGTGCAAGCATTTTTTCGATTT  | AP005672   |
|                          | 19-2 | CAACAGAACCATAATAGTATT      | AP005672   |

## For internal sequencing of chloroplast DNA

| DNA fragment | Name | Sequence (5'→ 3')                           | Ref.       |
|--------------|------|---------------------------------------------|------------|
| Fragment 2   | 2-3  | CCCTTTCTTTTTTTCATCAGTAATC                   | This study |
| Fragment 4   | 4-3  | AGACTATACGAACAAATGCCTGA                     | This study |
|              | 4-4  | TCTAAATCCATAGCAAATCCTG                      | This study |
| Fragment 5   | 5-3  | GAGGGGTCCAATACTATCTA                        | This study |
|              | 5-4  | CTTGAAATAGAGAAAATAATGTTG                    | This study |
| Fragment 6   | 6-3  | TTTGTCATGCTACTGTTCCCTC                      | This study |
| Fragment 7   | 7-3  | AAAGCTCATGGCGGTGTATC                        | This study |
| Fragment 8   | 8-3  | CCCAAGCATTGACCTGATAAC                       | This study |
| Fragment 11  | 11-3 | AGTATGGGTTTTGTAGTAGGAG                      | AB086179   |
|              | 11-4 | GTCTCCCAACATACCAAACT                        | AB086179   |
|              | 11-5 | ATTTCTTTCTTTGTTTCCATGTGTC                   | This study |
| Fragment 12  | 12-3 | TTCGTCCATCAAAATTAACAAA                      | This study |
|              | 12-4 | TATCAATCGAAGGACTCTAAAC                      | This study |
| Fragment 13  | 13-3 | TTGGGTTAAGATTTGGTGGAA                       | This study |
|              | 13-4 | AGTAACAATAATGGTGAGAAATC                     | This study |
| Fragment 14  | 14-3 | CCCTTCTCTATTACCACCCAC                       | This study |
| Fragment 15  | 15-3 | TATTATTTTCATCTTTCTTTATTA                    | This study |
|              | 15-4 | ATTCAATTTCTATAAAGCTAAGTT                    | This study |
| Fragment 16  | 16-3 | CCTTTCGCTGACATTATTACC                       | AB086179   |
|              | 16-4 | GACCCTAATCCAGAATGTGAG                       | AB086179   |
| Fragment 17  | 17-3 | CCAGTATATCTAGCGTCTTTTGG                     | This study |
|              | 17-4 | TTATCTCATCTCAAAATCAATATCG                   | This study |
|              | 17-5 | GTATCGTAAGCTGATGGACCTATG                    | This study |
|              | 17-6 | AGGAGAAGCCGTAGAAGTAGTTG                     | This study |
|              | 17-7 | TGATTCGATCTTACCAGTTACGTTG                   | This study |
| Fragment 18  | 18-3 | ACCTTATACTTTTATTTTTTCCAAG                   | This study |
|              | 18-4 | ACTTCTTATTTGAACTTAAAAAAC                    | This study |
|              | 18-5 | CACGCTCTGTAGGATTTGAAC                       | AB086179   |
| Fragment 19  | 18-6 | AGGGATGTAGCGCAGTTTGG                        | AB086179   |
|              | 18-2 | GACTAGAGTTAAACGTGGGTATG                     | AP005672   |
|              | 19-3 | TTTCGAGCTACATACCCACGT                       | AP005672   |
|              | 19-4 | GGTCTTATGGTTCCTATGGTCAG                     | This study |
|              | 19-5 | AATTAACCCCTACTAAAGAAAACCTATGGCA<br>TTGTTGAT | AP005672   |

## For amplification of cDNA

| Gene        | Name   | Sequence (5'→ 3')          | Ref.       |
|-------------|--------|----------------------------|------------|
| <i>rps4</i> | 1-1    | CTGAGAAGAACCCATAGAGAAAA    | This study |
|             | 1-2    | TATTATTTCTTTTACTACTTCTTTTG | This study |
| <i>ndhJ</i> | ndhJ-1 | AATGAGCGAAAAATATAAAGAAA    | This study |
|             | ndhJ-2 | CGGGAGGATGAATAGATATGAT     | This study |
| <i>ndhK</i> | ndhK-1 | GTTCGGTTTATGCGTGGCGG       | This study |
|             | ndhK-2 | TATTATATTTTCGCTCAITTTCTCC  | This study |
| <i>ndhC</i> | ndhC-1 | AACCAITCTTTTTTATTTACAGGAG  | This study |
|             | ndhC-2 | TTCTCGATTTTATTTTCACAATTTA  | This study |

|                    |         |                           |            |
|--------------------|---------|---------------------------|------------|
| <i>atpE</i>        | atpE-1  | ATTGATGAAGCTACTGCGAAGGC   | This study |
|                    | atpE-2  | TCTTGAATCGAAAAATCTCTCTT   |            |
| <i>atpB</i>        | 7-1     | GAGCCATTACACGAAGATTAG     | This study |
|                    | 7-2     | GACTTTTCTCGGTACAATCAG     |            |
| <i>accD</i>        | accD-1  | TAGTCAGCCGTAAGAGAAAAAG    | This study |
|                    | accD-2  | AAGATTGATTTGATTTCGACGGGTG |            |
| <i>psaI</i>        | psaI-1  | TTATTAAGGTAATTTTTATG      | This study |
|                    | psaI-2  | CGATCCAACAATAAAAAATATAC   |            |
| <i>ycf4</i>        | ycf4-1  | TATTCGGCTCTTTCGTCCCATC    | This study |
|                    | ycf4-2  | ACTGAAAGAAACAGAAAAACATC   |            |
| <i>ycf10</i>       | ycf10-1 | CTCCGTTCTGGCAAAGTATAAG    | This study |
|                    | ycf10-2 | ACAGTAACAATAATGGTGAGAAATC |            |
| <i>petA</i>        | 14-1    | GGAATTATAAGCCGGGGGTAGC    | This study |
|                    | 14-2    | CAGCAACCATCAATAAGAGAGGAA  |            |
| <i>psbJ-L-F-E</i>  | 16-1    | TAAATTGTACGTGTATAGTTCCTTC | This study |
|                    | 16-2    | TTATGTCCCCCTCGCCTCTAC     |            |
| <i>petL-G</i>      | 18-1    | AATCTAGGTAATGCTTTACGAGGG  | This study |
|                    | petG-1  | ATTAGACCTCCCTATCTTTTTTAG  |            |
| <i>psaJ</i>        | psaJ-1  | TACCTTTTTGTTATATGAACCTTTG | This study |
|                    | 18-4    | ACTTCCTTATTTGAACCTAAAAAAC |            |
| <i>rpl33-rps18</i> | 18-3    | ACCTTATACTTTTATTTTTTCCAAG | This study |
|                    | rps18-1 | TTTTCTTCTCCCTCCAACCTTAG   |            |
| <i>rpl20</i>       | rpl20-1 | CTCATTCTTTATCAAAATTATTAG  | This study |
|                    | rpl20-2 | TTTGTTCCGATCTGTTTTACTTCC  |            |
| <i>5'rps12</i>     | 19-4    | GGTCTTATGGTTCCTATGGTCAG   | This study |
|                    | rps12-1 | ACCGATCCCTAATACTTAAAGTTCC |            |
| <i>clpP</i>        | clpP-1  | TAAITGATTGGGTTGTTACGCTTTC | This study |
|                    | clpP-2  | ATCTGATGGATTCTTATCTCATAG  |            |

For internal sequencing of cDNA

| Gene              | Name | Sequence (5'→3')       | Ref.       |
|-------------------|------|------------------------|------------|
| <i>petA</i>       | 14-3 | CCCTTCCTCTATTACCACCCAC | This study |
| <i>psbJ-L-F-E</i> | 16-3 | CCTTTCGCTGACATTATTACC  | AB086179   |
|                   | 16-4 | GACCCTAATCCAGAATGTGAG  | AB086179   |

Supplementary Table S2. List of Newly Identified RNA editing Sites in *T. lepidzioides*  
Number in parentheses indicates nucleotide position, given with respect to the first base of the initiation codon(\*), or the next base to the stop codon(\*\*) as 1. Editing sites that did not alter the coded amino acid coding are indicated as "silent", and double editing sites are indicated as double.

| Gene        | Codon Position | Genomic DNA | cDNA       | Remarks                               |
|-------------|----------------|-------------|------------|---------------------------------------|
| <i>rps4</i> | 1              | Thr(aCg)    | → Met(aTg) |                                       |
| <i>rps4</i> | 18             | Ser(tCa)    | → Leu(tTa) |                                       |
| <i>rps4</i> | 59             | His(Cat)    | → Tyr(Tat) |                                       |
| <i>rps4</i> | 84             | Ser(tCg)    | → Leu(tTg) |                                       |
| <i>rps4</i> | 133            | Pro(ccC)    | → Pro(ccT) | silent                                |
| <i>ndhJ</i> | 49             | Ser(tcC)    | → Ser(tcT) | silent                                |
| <i>ndhJ</i> | 58             | Gly(ggC)    | → Gly(ggT) | silent                                |
| <i>ndhJ</i> | 59             | Ser(tCt)    | → Phe(tTt) |                                       |
| <i>ndhJ</i> | 62             | Leu(ctC)    | → Leu(ctT) | silent                                |
| <i>ndhJ</i> | 64             | Ser(tcC)    | → Ser(tcT) | silent                                |
| <i>ndhK</i> | 34             | Thr(aCt)    | → Ile(aTt) |                                       |
| <i>ndhK</i> | 60             | His(Cac)    | → Tyr(Tac) |                                       |
| <i>ndhK</i> | 64             | Arg(Cgt)    | → Cys(Tgt) |                                       |
| <i>ndhK</i> | 95             | Pro(cCc)    | → Leu(cTc) |                                       |
| <i>ndhK</i> | 97             | Thr(aCa)    | → Ile(aTa) |                                       |
| <i>ndhK</i> | 104            | Thr(aCg)    | → Met(aTg) |                                       |
| <i>ndhK</i> | 126            | Thr(aCg)    | → Met(aTg) |                                       |
| <i>ndhC</i> | 2              | Phe(ttC)    | → Phe(ttT) | silent                                |
| <i>ndhC</i> | 67             | Ser(tCa)    | → Leu(tTa) |                                       |
| <i>ndhC</i> | 71             | Thr(aCt)    | → Ile(aTt) |                                       |
| <i>ndhC</i> | 72             | Phe(ttC)    | → Phe(ttT) | silent                                |
| <i>ndhC</i> | 78             | Ser(tCt)    | → Phe(tTt) |                                       |
| <i>ndhC</i> | 98             | Ser(tCg)    | → Leu(tTg) |                                       |
| <i>ndhC</i> | 104            | Ser(tCa)    | → Leu(tTa) |                                       |
| <i>ndhC</i> | 108            | Ser(tCg)    | → Leu(tTg) |                                       |
| <i>ndhC</i> | 117            | Ser(tCg)    | → Leu(tTg) |                                       |
| <i>atpE</i> | 24             | Pro(cCa)    | → Leu(cTa) |                                       |
| <i>atpE</i> | 40             | Pro(cCt)    | → Leu(cTt) |                                       |
| <i>atpE</i> | 44             | Pro(cCg)    | → Leu(cTg) |                                       |
| <i>atpE</i> | 119            | Ser(tCt)    | → Phe(tTt) |                                       |
| <i>atpE</i> | 134            | Ser(tCt)    | → Phe(tTt) |                                       |
| <i>atpB</i> | (-12)*         | C           | → T        | 5'-untranslated region of <i>atpB</i> |
| <i>atpB</i> | (-10)*         | C           | → T        | 5'-untranslated region of <i>atpB</i> |
| <i>atpB</i> | (-4)*          | C           | → T        | 5'-untranslated region of <i>atpB</i> |
| <i>atpB</i> | 13             | Pro(cCc)    | → Leu(cTc) |                                       |
| <i>atpB</i> | 33             | Ser(tCc)    | → Phe(tTc) |                                       |
| <i>atpB</i> | 44             | Pro(Cct)    | → Ser(Tct) |                                       |
| <i>atpB</i> | 75             | Ala(gCg)    | → Val(gTg) |                                       |
| <i>atpB</i> | 77             | Thr(aCg)    | → Met(aTg) |                                       |
| <i>atpB</i> | 96             | Ser(tCa)    | → Leu(tTa) |                                       |
| <i>atpB</i> | 105            | Pro(cCt)    | → Leu(cTt) |                                       |
| <i>atpB</i> | 119            | Ser(tCa)    | → Leu(tTa) |                                       |
| <i>atpB</i> | 137            | Ser(tCt)    | → Phe(tTt) |                                       |
| <i>atpB</i> | 157            | Ser(tCa)    | → Leu(tTa) |                                       |

|             |     |                     |        |
|-------------|-----|---------------------|--------|
| <i>atpB</i> | 168 | Ser(tCa) → Leu(tTa) |        |
| <i>atpB</i> | 181 | Thr(aCg) → Met(aTg) |        |
| <i>atpB</i> | 197 | Ser(tCc) → Phe(tTc) |        |
| <i>atpB</i> | 210 | Pro(cCt) → Leu(cTt) |        |
| <i>atpB</i> | 214 | Thr(aCg) → Met(aTg) |        |
| <i>atpB</i> | 249 | Ser(tCa) → Leu(tTa) |        |
| <i>atpB</i> | 252 | Pro(cCa) → Leu(cTa) |        |
| <i>atpB</i> | 258 | Ser(tCt) → Phe(tTt) |        |
| <i>atpB</i> | 268 | Ser(tCa) → Leu(tTa) |        |
| <i>atpB</i> | 274 | Ser(tCt) → Phe(tTt) |        |
| <i>atpB</i> | 276 | Ser(tCt) → Phe(tTt) |        |
| <i>atpB</i> | 286 | Pro(cCa) → Leu(cTa) |        |
| <i>atpB</i> | 296 | His(Cat) → Tyr(Tat) |        |
| <i>atpB</i> | 300 | Pro(cCg) → Leu(cTg) |        |
| <i>atpB</i> | 307 | Ser(tCg) → Leu(tTg) |        |
| <i>atpB</i> | 321 | Pro(Cca) → Ser(Tca) |        |
| <i>atpB</i> | 326 | His(Cat) → Tyr(Tat) |        |
| <i>atpB</i> | 350 | Pro(cCa) → Leu(cTa) |        |
| <i>atpB</i> | 366 | Ser(tCa) → Leu(tTa) |        |
| <i>atpB</i> | 370 | Pro(Cct) → Ser(Tct) |        |
| <i>atpB</i> | 373 | Pro(cCt) → Leu(cTt) |        |
| <i>atpB</i> | 411 | Ser(tCa) → Leu(tTa) |        |
| <i>atpB</i> | 439 | Ser(tCt) → Phe(tTt) |        |
| <i>atpB</i> | 449 | Pro(cCc) → Leu(cTc) |        |
| <i>atpB</i> | 460 | Pro(cCt) → Leu(cTt) |        |
| <i>atpB</i> | 472 | Ser(tCt) → Phe(tTt) |        |
| <i>atpB</i> | 473 | His(Cat) → Tyr(Tat) |        |
| <i>atpB</i> | 474 | Pro(cCg) → Leu(cTg) |        |
| <i>atpB</i> | 488 | Ser(tCa) → Leu(tTa) |        |
| <i>rbcL</i> | 24  | His(Cat) → Tyr(Tat) |        |
| <i>rbcL</i> | 37  | Ser(tCg) → Leu(tTg) |        |
| <i>rbcL</i> | 70  | Arg(Cgg) → Trp(Tgg) |        |
| <i>rbcL</i> | 100 | His(Cat) → Tyr(Tat) |        |
| <i>rbcL</i> | 104 | Pro(ccC) → Pro(ccT) | silent |
| <i>rbcL</i> | 105 | Ser(tCa) → Leu(tTa) |        |
| <i>rbcL</i> | 107 | Pro(cCa) → Leu(cTa) |        |
| <i>rbcL</i> | 133 | Pro(cCa) → Leu(cTa) |        |
| <i>rbcL</i> | 135 | Pro(cCa) → Leu(cTa) |        |
| <i>rbcL</i> | 148 | Ser(tCt) → Phe(tTt) |        |
| <i>rbcL</i> | 180 | Ser(tCa) → Leu(tTa) |        |
| <i>rbcL</i> | 185 | His(Cat) → Tyr(Tat) |        |
| <i>rbcL</i> | 193 | Pro(cCt) → Leu(cTt) |        |
| <i>rbcL</i> | 212 | Thr(aCg) → Met(aTg) |        |
| <i>rbcL</i> | 218 | Ser(tCc) → Phe(tTc) |        |
| <i>rbcL</i> | 240 | Ser(tCg) → Leu(tTg) |        |
| <i>rbcL</i> | 250 | Thr(aCg) → Met(aTg) |        |
| <i>rbcL</i> | 265 | Ala(gCc) → Val(gTc) |        |
| <i>rbcL</i> | 266 | Thr(aCg) → Met(aTg) |        |
| <i>rbcL</i> | 270 | Ser(tCg) → Leu(tTg) |        |
| <i>rbcL</i> | 284 | Arg(Cgc) → Cys(Tgc) |        |
| <i>rbcL</i> | 289 | Pro(cCa) → Leu(cTa) |        |
| <i>rbcL</i> | 297 | Thr(aCg) → Met(aTg) |        |

|              |     |                     |                |
|--------------|-----|---------------------|----------------|
| <i>rbcL</i>  | 343 | Pro(cCa) → Leu(cTa) |                |
| <i>rbcL</i>  | 348 | Pro(cCa) → Leu(cTa) |                |
| <i>rbcL</i>  | 371 | Ser(tCg) → Leu(tTg) |                |
| <i>rbcL</i>  | 385 | Arg(Cgg) → Trp(Tgg) |                |
| <i>rbcL</i>  | 390 | Ser(tCg) → Leu(tTg) |                |
| <i>rbcL</i>  | 394 | Ser(tCt) → Phe(tTt) |                |
| <i>rbcL</i>  | 407 | Ser(tCg) → Leu(tTg) |                |
| <i>rbcL</i>  | 411 | Arg(Cgg) → Trp(Tgg) |                |
| <i>rbcL</i>  | 424 | Ser(tCa) → Leu(tTa) |                |
| <i>accD</i>  | 6   | Arg(Cgg) → Trp(Tgg) |                |
| <i>accD</i>  | 31  | Ser(agC) → Ser(agT) | silent         |
| <i>accD</i>  | 51  | Arg(Cgt) → Cys(Tgt) |                |
| <i>accD</i>  | 88  | Ser(tCa) → L (tTa)  |                |
| <i>accD</i>  | 94  | Arg(Cgg) → Trp(Tgg) |                |
| <i>accD</i>  | 149 | Thr(aCg) → Met(aTg) |                |
| <i>accD</i>  | 151 | Ser(tCt) → Phe(tTt) |                |
| <i>accD</i>  | 153 | Ser(tCt) → Phe(tTt) |                |
| <i>accD</i>  | 169 | Pro(cCt) → Leu(cTt) |                |
| <i>accD</i>  | 170 | Ile(atC) → Ile(atT) | silent         |
| <i>accD</i>  | 198 | Pro(cCa) → Leu(cTa) |                |
| <i>accD</i>  | 206 | Pro(Ccc) → Ser(Tcc) |                |
| <i>accD</i>  | 208 | Ser(tCa) → L (tTa)  |                |
| <i>accD</i>  | 223 | Pro(cCC) → Leu(cTT) | double, silent |
| <i>accD</i>  | 237 | Thr(aCg) → Met(aTg) |                |
| <i>accD</i>  | 252 | Ser(tCt) → Phe(tTt) |                |
| <i>accD</i>  | 284 | Ser(tCg) → L (tTg)  |                |
| <i>psaI</i>  | 3   | Ala(gcC) → Ala(gcT) | silent         |
| <i>psaI</i>  | 10  | Ser(tCt) → Phe(tTt) |                |
| <i>ycf4</i>  | 1   | Thr(aCg) → Met(aTg) |                |
| <i>ycf4</i>  | 43  | His(Cac) → Tyr(Tac) |                |
| <i>ycf4</i>  | 82  | Arg(Cgt) → Cys(Tgt) |                |
| <i>ycf4</i>  | 86  | Arg(Cgg) → Trp(Tgg) |                |
| <i>ycf4</i>  | 95  | Ser(tCc) → Phe(tTc) |                |
| <i>ycf4</i>  | 120 | Ser(tCt) → Phe(tTt) |                |
| <i>ycf4</i>  | 163 | Pro(cCg) → Leu(cTg) |                |
| <i>ycf4</i>  | 176 | Ser(tCc) → Phe(tTc) |                |
| <i>ycf4</i>  | 177 | Ser(tCg) → Leu(tTg) |                |
| <i>ycf10</i> | 83  | Ser(tCa) → Leu(tTa) |                |
| <i>ycf10</i> | 306 | Ser(tCt) → Phe(tTt) |                |
| <i>ycf10</i> | 399 | Ala(gcC) → Ala(gcT) | silent         |
| <i>ycf10</i> | 407 | Pro(cCa) → Leu(cTa) |                |
| <i>ycf10</i> | 415 | Ser(tCa) → Leu(tTa) |                |
| <i>ycf10</i> | 433 | Ser(tCt) → Phe(tTt) |                |
| <i>ycf10</i> | 436 | Pro(cCc) → Leu(cTc) |                |
| <i>ycf10</i> | 437 | Pro(cCa) → Leu(cTa) |                |
| <i>ycf10</i> | 441 | Pro(cCa) → Leu(cTa) |                |
| <i>ycf10</i> | 442 | Arg(Cgt) → Cys(Tgt) |                |
| <i>ycf10</i> | 489 | Arg(Cgg) → Trp(Tgg) |                |
| <i>ycf10</i> | 508 | Thr(aCg) → Met(aTg) |                |
| <i>petA</i>  | 60  | Arg(Cgt) → Cys(Tgt) |                |
| <i>petA</i>  | 81  | Pro(CCt) → Phe(TTt) | double         |
| <i>petA</i>  | 111 | Pro(cCt) → Leu(cTt) |                |

|                  |         |                      |                                        |
|------------------|---------|----------------------|----------------------------------------|
| <i>petA</i>      | 113     | Ser(tCa) → Leu(tTa)  |                                        |
| <i>petA</i>      | 164     | Ser(tCt) → Phe(tTt)  |                                        |
| <i>petA</i>      | 242     | Ile(atC) → Ile(atT)  | silent                                 |
| <i>psbL-psbJ</i> | (-95)*  | C → T                | intergenic spacer                      |
| <i>psbL-psbJ</i> | (-54)*  | C → T                | intergenic spacer                      |
| <i>psbJ</i>      | 20      | Pro(cCc) → Leu(cTc)  |                                        |
| <i>psbJ</i>      | 24      | Ser(tCa) → Leu(tTa)  |                                        |
| <i>psbJ</i>      | 34      | Ser(tcC) → Ser(tcT)  | silent                                 |
| <i>psbJ</i>      | 36      | Ser(tCa) → Leu(tTa)  |                                        |
| <i>psbJ</i>      | 39      | Pro(Ccc) → Ser(Tcc)  |                                        |
| <i>psbJ</i>      | 40      | Leu(Cta) → Leu(Tta)  | silent                                 |
| <i>psbL</i>      | 31      | Pro(cCa) → Leu(cTa)  |                                        |
| <i>psbL</i>      | 33      | Pro(Cct) → Ser(Tct)  |                                        |
| <i>psbL</i>      | 39      | Gln(Caa) → Stop(Taa) |                                        |
| <i>psbF</i>      | 26      | Leu(Ctt) → Phe(Ttt)  |                                        |
| <i>psbF</i>      | 28      | Ser(tCa) → Leu(tTa)  |                                        |
| <i>psbE</i>      | 20      | Arg(Cgg) → Trp(Tgg)  |                                        |
| <i>psbE</i>      | 30      | Ser(tCg) → Leu(tTg)  |                                        |
| <i>psbE</i>      | 35      | Arg(Cgg) → Trp(Tgg)  |                                        |
| <i>petL</i>      | 1       | Thr(aCg) → Met(aTg)  |                                        |
| <i>petL</i>      | 8       | Phe(ttC) → Phe(ttT)  | silent                                 |
| <i>petL</i>      | 11      | Leu(Cta) → Leu(Tta)  | silent                                 |
| <i>petL</i>      | 21      | Ser(tCa) → Leu(tTa)  |                                        |
| <i>petL</i>      | 32      | Gln(Cag) → Stop(Tag) |                                        |
| <i>petL-petG</i> | (-30)*  | C → T                | intergenic spacer                      |
| <i>petL-petG</i> | (-25)*  | C → T                | intergenic spacer                      |
| <i>petG</i>      | 11      | Ser(tCg) → Leu(tTg)  |                                        |
| <i>petG</i>      | 15      | Pro(Cca) → Ser(Tca)  |                                        |
| <i>petG</i>      | 22      | Phe(ttC) → Phe(ttT)  | silent                                 |
| <i>petG</i>      | 38      | Arg(Cga) → Stop(Tga) |                                        |
| <i>petG</i>      | (+2)**  | C → T                | 3'-untranslated region of <i>petG</i>  |
| <i>petG</i>      | (+22)** | C → T                | 3'-untranslated region of <i>petG</i>  |
| <i>rpl33</i>     | (-20)*  | C → T                | 5'-untranslated region of <i>rpl33</i> |
| <i>rpl33</i>     | 1       | Thr(aCg) → Met(aTg)  |                                        |
| <i>rpl33</i>     | 20      | Gln(Caa) → Stop(Taa) |                                        |
| <i>rpl33</i>     | 42      | Pro(ccC) → Pro(ccT)  | silent                                 |
| <i>rpl33</i>     | 44      | Arg(Cga) → Stop(Tga) |                                        |
| <i>rpl33</i>     | 60      | His(caC) → His(caT)  | silent                                 |
| <i>rps18</i>     | 30      | Arg(Cgc) → Cys(Tgc)  |                                        |
| <i>rps18</i>     | 67      | Ser(tCa) → Leu(tTa)  |                                        |
| <i>rps18</i>     | 69      | Pro(Cct) → Ser(Tct)  |                                        |
| <i>rpl20</i>     | 33      | Arg(Cga) → Stop(Tga) |                                        |
| <i>rpl20</i>     | 44      | Ala(gCt) → Val(gTt)  |                                        |
| <i>rpl20</i>     | 47      | His(Cat) → Tyr(Tat)  |                                        |
| <i>rpl20</i>     | 81      | Gln(Caa) → Stop(Taa) |                                        |
| <i>5'-rps12</i>  | 7       | Leu(Ctg) → Leu(Ttg)  | silent                                 |
| <i>clpP</i>      | (-19)*  | C → T                | 5'-untranslated region of <i>clpP</i>  |
| <i>clpP</i>      | 20      | Arg(Cgg) → Trp(Tgg)  |                                        |
| <i>clpP</i>      | 27      | Leu(ctC) → Leu(ctT)  | silent                                 |
| <i>clpP</i>      | 28      | His(Cat) → Tyr(Tat)  |                                        |
| <i>clpP</i>      | 35      | Pro(cCa) → Leu(cTa)  |                                        |
| <i>clpP</i>      | 45      | Asn(aaC) → Asn(aaT)  | silent                                 |

|             |     |                     |                |
|-------------|-----|---------------------|----------------|
| <i>clpP</i> | 47  | Pro(cCC) → Leu(cTT) | double, silent |
| <i>clpP</i> | 88  | Ala(gCa) → Val(gTa) |                |
| <i>clpP</i> | 106 | Thr(aCc) → Ile(aTc) |                |
| <i>clpP</i> | 107 | Ser(tCa) → Leu(tTa) |                |
| <i>clpP</i> | 142 | Thr(aCg) → Met(aTg) |                |
| <i>clpP</i> | 192 | Phe(ttC) → Phe(ttT) | silent         |
| <i>clpP</i> | 195 | Thr(aCa) → Ile(aTa) |                |
| <i>clpP</i> | 199 | Ser(tCa) → Leu(tTa) |                |

---

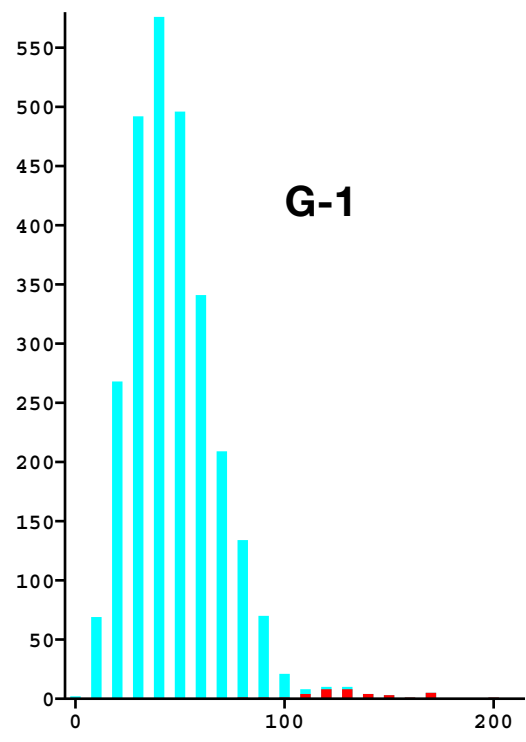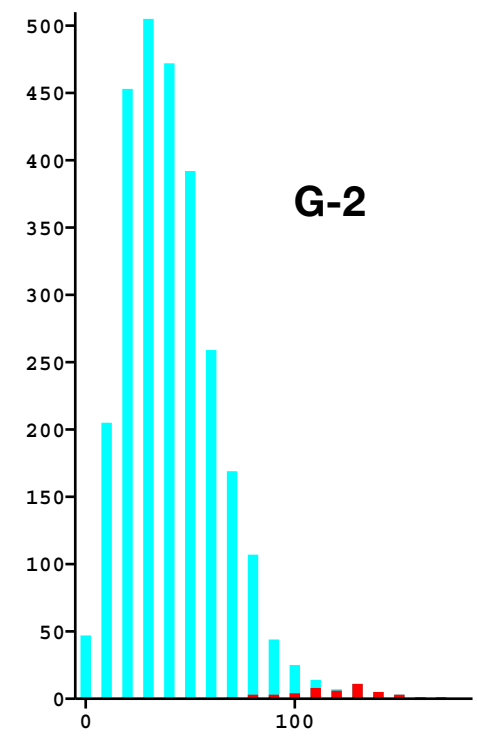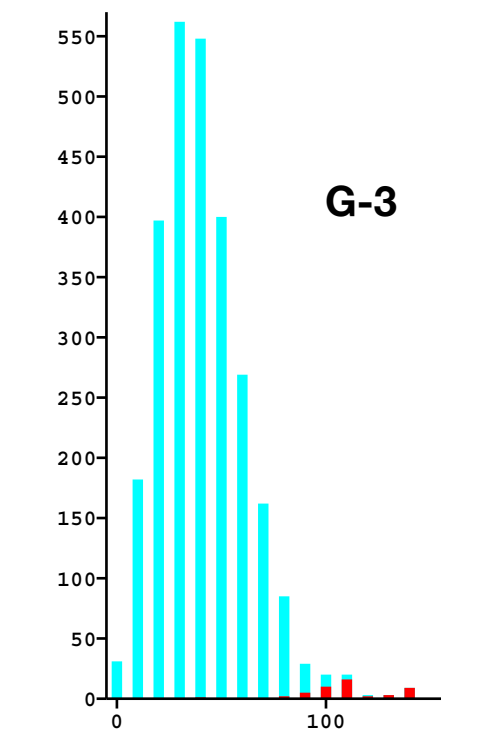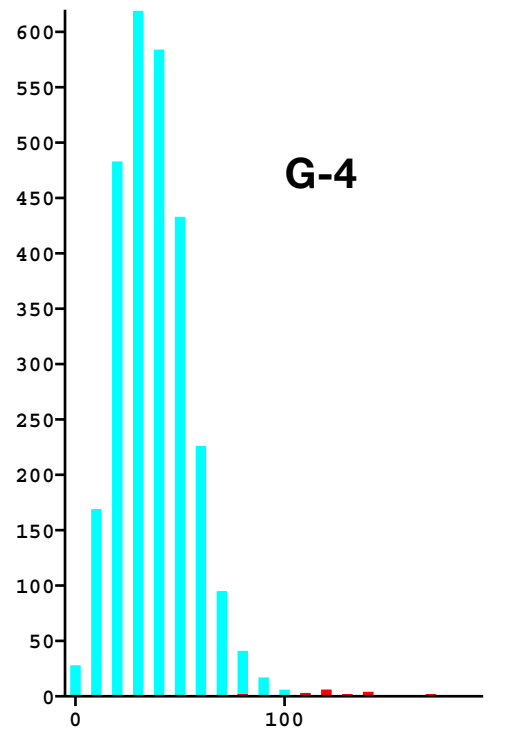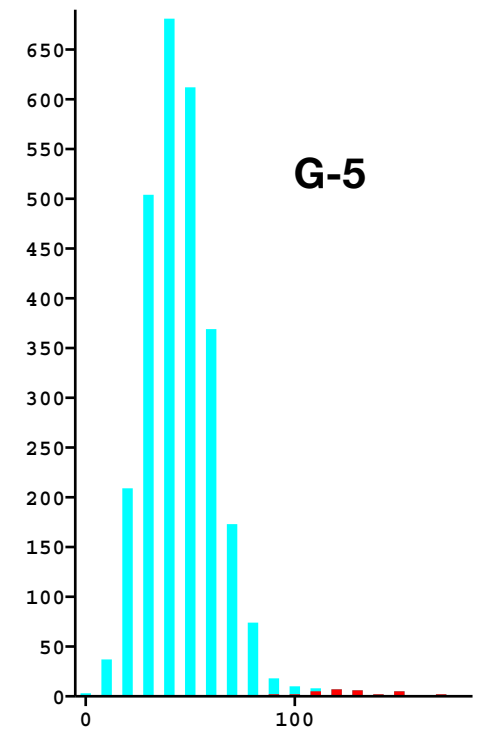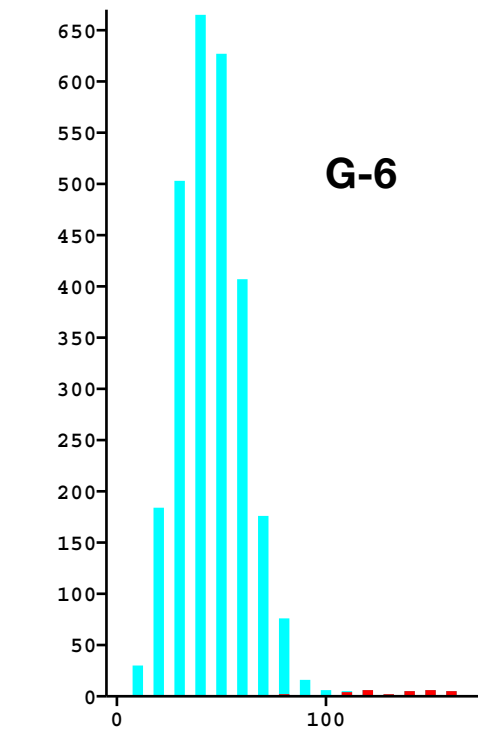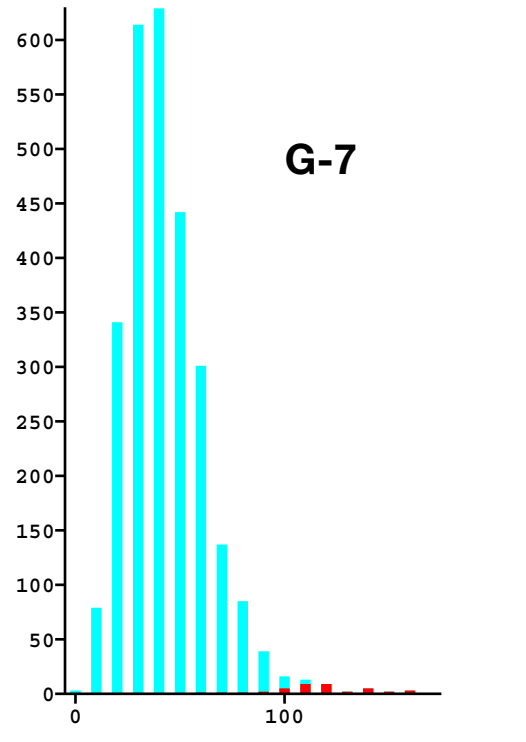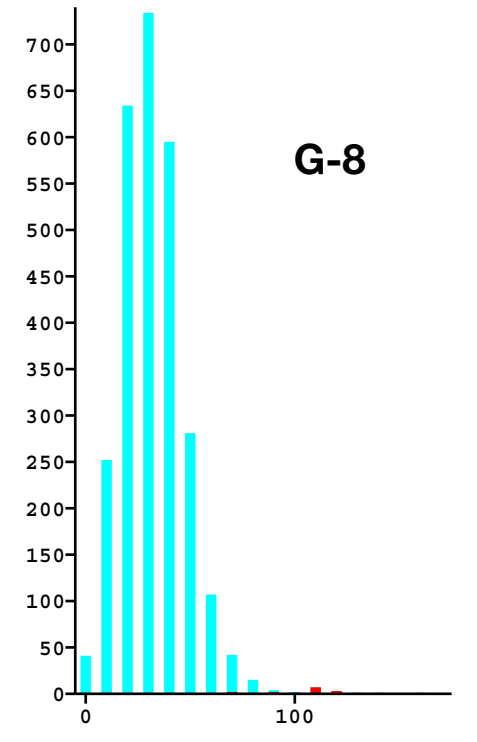

**■: edited C**  
**■: non-edited C**
